# Supplementary material
Source: Springer Nature journal article supplement (https://www.springermedizin.de/resource/supplementary/13048_2013_236_MOESM2_ESM.pdf/9665192)

Additional fig.1

MOC31

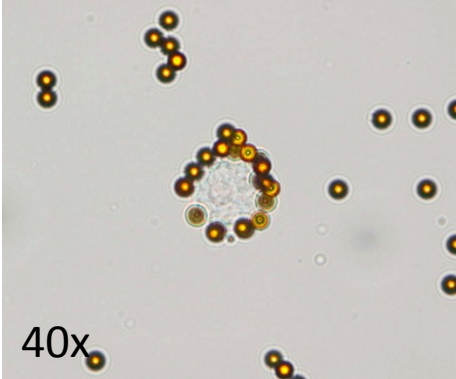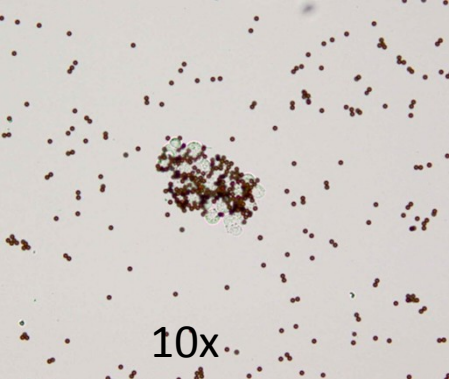

IgG

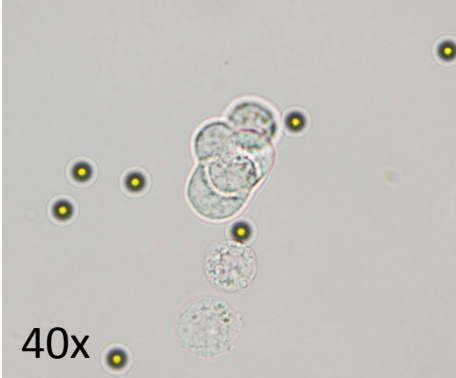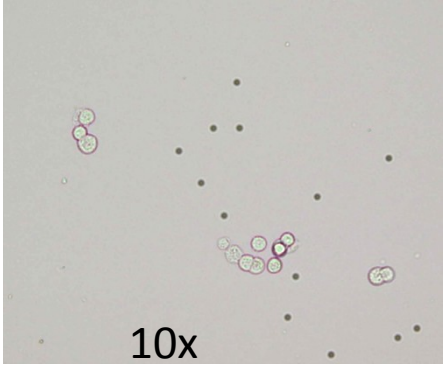

Supplement: MOESM2 [file 9665192]
